# Supplementary material
Source: MDPI journal article supplement (https://www.mdpi.com/search?q=metals-09-01223)
Supplement: s001 [file metals-09-01223-s001.pdf]

# Modeling Metallothermic Reduction of Aluminium-Scandium Alloys in FactSage 7.2

Frederic Brinkmann, Carolin Mazurek

# Melting Point of Aluminium-Scandium Alloys

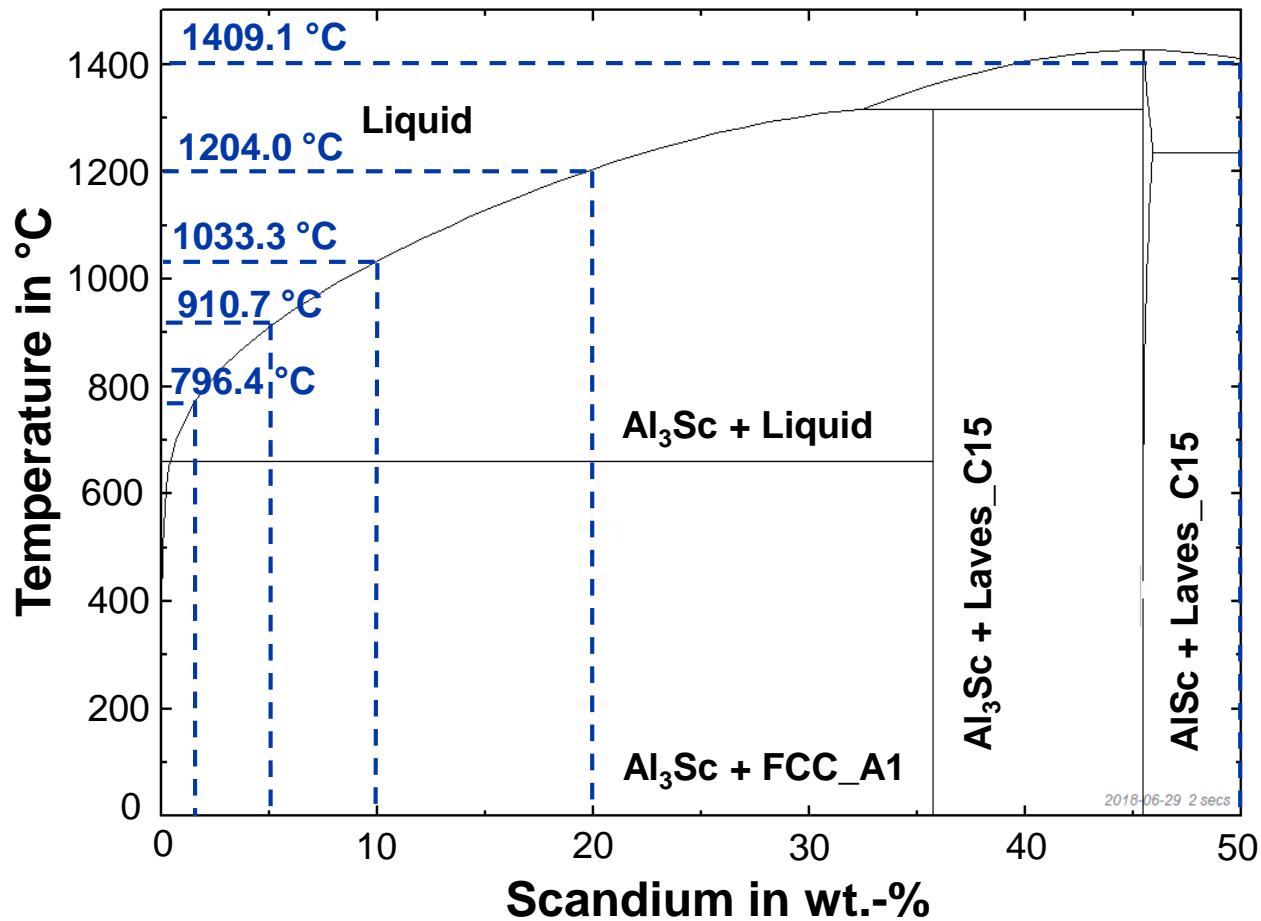

# Calculations in FactSage 7.2

Equilib - Reactants

File Edit Table Units Data Search Help

T(C) P(atm) Energy(J) Mass(g) Vol(litre)

1-2

| Mass(g) | Species | Phase | T(C) | P(total)** | Stream# | Data |
|---------|---------|-------|------|------------|---------|------|
| 20      | Sc      |       |      |            | 1       |      |
| + 80    | Al      |       |      |            | 1       |      |

**Example for 20 wt.-% Al-Sc alloy**

Initial Conditions

Next >>

FactSage 7.2 Compound: 2/20 databases Solution: 1/19 databases

Equilib - Menu: last system

File Units Parameters Help

T(C) P(atm) Energy(J) Mass(g) Vol(litre)

Reactants (2)

(gram) 20 Sc + 80 Al

Products

Compound species

- gas  ideal  real 4
- aqueous 0
- pure liquids 0
- \* pure solids 17
- \* - custom selection species: 21

Solution phases

| * | + | Base-Phase  | Full Name            |
|---|---|-------------|----------------------|
|   | l | FTlite-Liqu | Liquid               |
|   | l | FTlite-FCC  | FCC_A1               |
|   | l | FTlite-BCC  | BCC_A2               |
|   | l | FTlite-HCP  | HCP_A3               |
|   | + | FTlite-B2   | BCC_B2               |
|   | l | FTlite-C15  | Laves_C15            |
|   | + | FTlite-L12  | Prototype_AuCu3-L12  |
|   | + | FTlite-L12b | Prototype_AuCu3-L12b |

Transitions - temperature

Number of transitions: All

Legend

- l - immiscible 5
- + - selected 4

Show  all  selected

species: 28 solutions: 14 Select

Final Conditions

| <A> | <B> | T(C)   | P(atm) | Product H(J) |
|-----|-----|--------|--------|--------------|
|     |     | 0 2000 | 1      |              |

10 steps  Table 2+ calculations

Equilibrium

- normal
- normal + transitions
- transitions only
- open

Calculate >>>

FactSage 7.2

Equilib - Results 1204.04 C (page 3/3)

Output Edit Show Pages

T(C) P(atm) Energy(J) Mass(g) Vol(litre)

660.15 C | 660.16 C - 1204.04 C -

| Species | Amount/mol | Mass fraction |
|---------|------------|---------------|
| Al      | 0.44488    | 0.20000       |
| Sc      | 2.9650     | 0.80000       |

**One liquid phase at 1204.04 °C**

| Phase                      | Species | Amount/mol | Mass fraction | Activity   |
|----------------------------|---------|------------|---------------|------------|
| PHASE: Liquid#1;#2         | Al      | 8.0000E+01 | 8.0000E-01    | 7.5835E-01 |
|                            | Sc      | 2.0000E+01 | 2.0000E-01    | 5.6763E-05 |
|                            | TOTAL:  | 1.0000E+02 | 1.0000E+00    | 1.0000E+00 |
| PHASE: Prototype_AuCu3-L12 | Al3Sc   | 0.0000E+00 | 1.0000E+00    | 1.0000E+00 |
|                            | TOTAL:  | 0.0000E+00 | 1.0000E+00    | 1.0000E+00 |
|                            | Sys     |            |               |            |
| PHASE: BCC_A2#1;#2         | Al      | 0.0000E+00 | 7.3292E-01    | 3.6105E-01 |
|                            | Sc      | 0.0000E+00 | 2.6708E-01    | 7.0240E-05 |
|                            | TOTAL:  | 0.0000E+00 | 1.0000E+00    | 7.8853E-01 |
| PHASE: FCC_A1#1;#2         | Al      | 0.0000E+00 | 8.2511E-01    | 4.5994E-01 |
|                            | Sc      | 0.0000E+00 | 1.7489E-01    | 5.3897E-05 |
|                            | TOTAL:  | 0.0000E+00 | 1.0000E+00    | 5.8162E-01 |
| PHASE: Laves C15#1;#2      | Al      | 0.0000E+00 | 0.86953       | 0.86953    |
|                            | Sc      | 0.0000E+00 | 0.13047       | 0.20000    |
|                            | TOTAL:  | 0.0000E+00 | 1.0000E+00    | 1.0000E+00 |

## Equilib-Mode

- Database: FactPS, FTlite

# Modeling Aluminium-Scandium Alloys

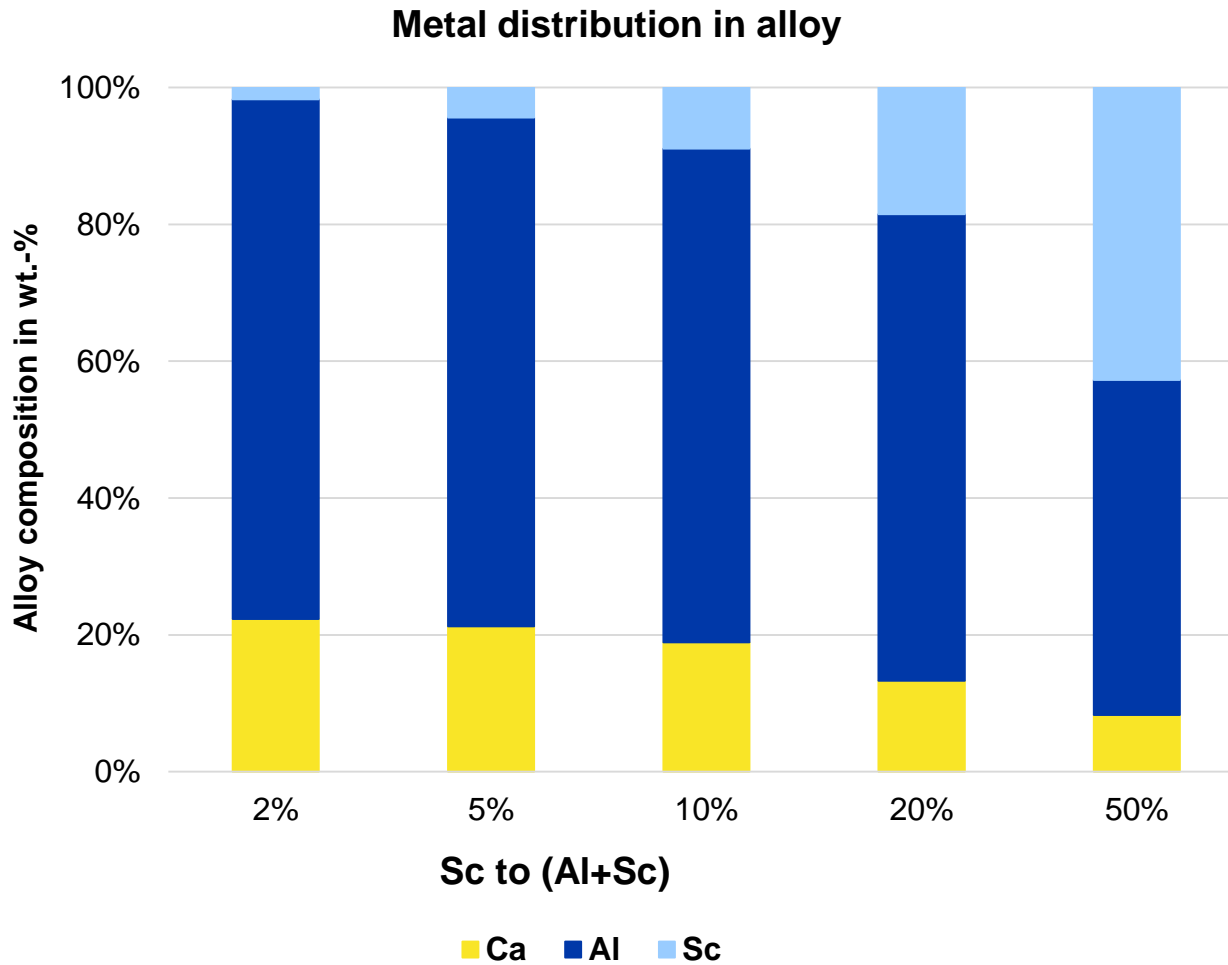

# Calculations in FactSage 7.2

| Mass(g)  | Species | Phase | T(C) | P(total)** | Stream# | Data |
|----------|---------|-------|------|------------|---------|------|
| 1        | ScF3    |       |      |            | 1       |      |
| + 15.82  | Al2O3   |       |      |            | 1       |      |
| + 19.245 | Ca      |       |      |            | 1       |      |

## Equilib-Mode

- Database: FactPS, FToxid, FTsalt and FTlite
- Results at 1400 °C and 1 atm
- Varying the amount of feed material to get Al-Sc alloys with different Sc-quantities (always starting with 1 g of Al)

Calculation of the composition of various Al-Sc alloys by using ScF3, Al2O3 and Ca as feed material

Example here for 5 wt.-% Al-Sc alloy

Databases - 4/20 compound databases, 3/19 solution databases

**Fact**  FactPS  FToxid  FTsalt  FTmisc  FTall  FT0xCN  FTfritz  FTHelg  FTpulp  FTlite

**FactSage**  FSopp  FSlead  FSstel  FSupsi  ELEM  FTdemo  FTnucl

**SGTE**  BINS  SGPS  SGTE  SGsold  SGnucl

**Private Databases**  SGTEa

Information -  
In Options it is recommended that the 'Minimum solution components' be set to '2'

Compound: C:\FactSage7.2\FACTDATA\Fslead54base.cdb  
- FSlead - FactSage lead intermetallic compounds (2015)

Solution: C:\FactSage7.2\FACTDATA\Fslead54soln.sdc  
- FSlead - FactSage lead alloy solutions (2015)

Options - search for product species

Include compounds:  
 gaseous ions (plasmas)  
 aqueous species

Limits:  
Organic species CxHy..., X(max) = 2  
Minimum solution components: 1 2 3 cpts

# Calculations in FactSage 7.2

Equilib - Menu: last system

File Units Parameters Help

T(C) P(atm) Energy(J) Mass(g) Vol(litre)

Reactants (3)

(gram) ScF3 + 15.82 Al2O3 + 19.245 Ca

Products

Compound species: gas ideal real 34, aqueous 0, pure liquids 0, pure solids 28, custom selection species: 62

Target: none, Estimate T(K): 1000, Mass(g): 0

Final Conditions: T(C) 1400, P(atm) 1, Product H(J)

Equilibrium: normal, transitions only, open

Solution phases table:

| * | + | Base-Phase   | Full Name         |
|---|---|--------------|-------------------|
|   | + | FToxid-CaAl  | CaAl2O4           |
|   | + | FToxid-MeA2  | (Ca,Sr)Al4O7      |
|   | + | FToxid-MeA6  | (Ca,Sr,Ba)Al12O19 |
|   | + | FToxid-CaFh  | CaF2-HT           |
|   | + | FToxid-CaFl  | CaF2-LT           |
|   | + | FTsalt-CaFH  | CaF2-HT           |
|   | + | FTsalt-CaFL  | CaF2-LT           |
|   |   | FTsalt-SALTA | A-Salt-liquid     |

Legend: - immiscible 9, + selected 26, species: 102, solutions: 44

Equilib - Results 1400 C

Output Edit Show Pages

T(C) P(atm) Energy(J) Mass(g) Vol(litre)

```

+ 3.0142E-46 O3
+ 1.4420E-54 O2F(g)
+ 3.3360E-61 F2O2)

+ 20.531 gram Monoxide#1
(20.531 gram, 0.36542 mol)
+ 0 gram Monoxide#2
(1400 C, 1 atm, a=1.0000)
( 99.577 wt.% CaO
+ 0.42345 wt.% Al2O3)

System component      Amount/mol      Amount/gram      Mole fraction      Mass fraction
Ca                     0.36457         14.611           0.49709            0.71166
Al                     1.7053E-03      4.6012E-02       2.3252E-03         2.2411E-03
O                      0.36713         5.8738           0.50058            0.28605

+ 9.9837 gram Liquid#1
(9.9837 gram, 0.33778 mol)
+ 0 gram Liquid#2
(1400 C, 1 atm, a=1.0000)
( 74.326 wt.% Al
+ 21.257 wt.% Ca
+ 2.8554E-15 wt.% F
+ 6.0954E-04 wt.% O
+ 4.4168 wt.% Sc)

System component      Amount/mol      Amount/gram      Mole fraction      Mass fraction
Sc                    9.8086E-03      0.44096          2.9038E-02         4.4168E-02
Ca                    5.2953E-02      2.1222           0.15677            0.21257
Al                    0.27502         7.4204           0.81419            0.74326
F                     1.5005E-17      2.8507E-16      4.4422E-17         2.8554E-17
O                     3.8035E-06      6.0854E-05      1.1260E-05         6.0954E-06

+ 5.5504 gram Liq-Oxyfluoride#1
(5.5504 gram, 8.1649E-02 mol)
+ 0 gram Liq-Oxyfluoride#2
(1400 C, 1 atm, a=1.0000)

```

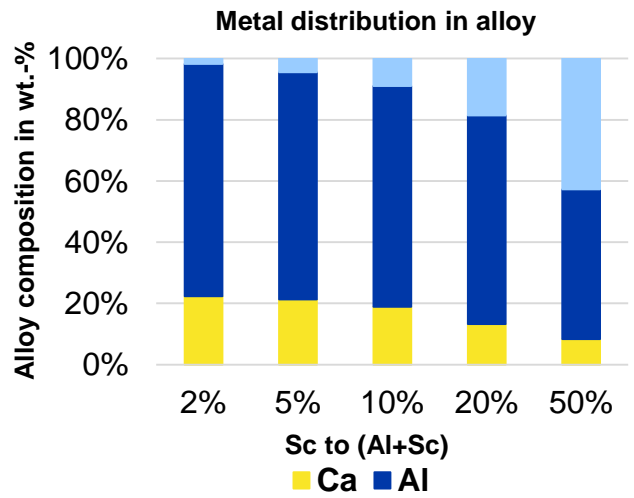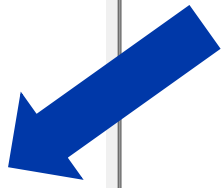

# Modeling of the Slag

## System for 20 % Al-Sc Alloy:

1 g  $\text{ScF}_3$  + 3,33 g  $\text{Al}_2\text{O}_3$  + 4,52 g Ca

Here are the slags  
from the alloys  
previously shown

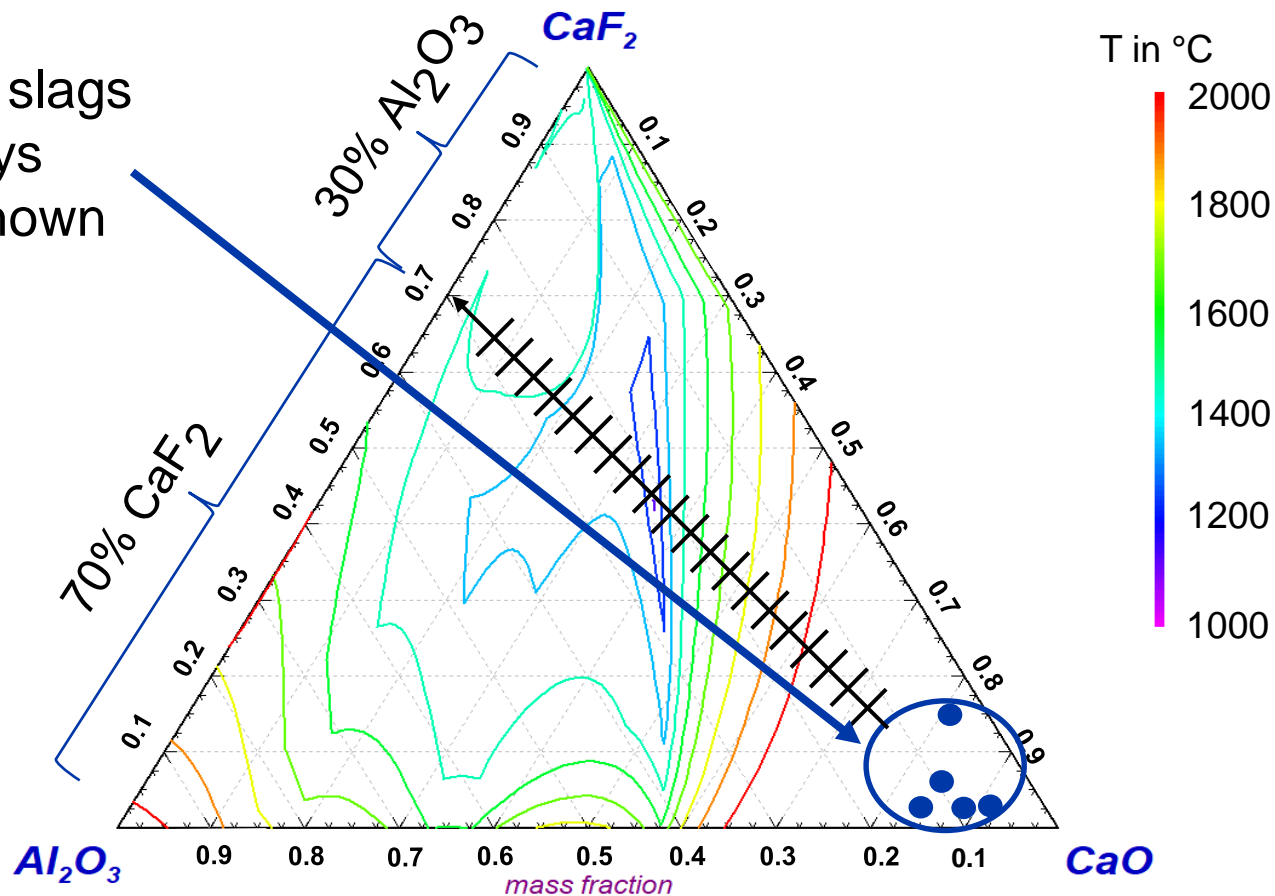

# Modeling of the Slag

## Target System:

1 g  $\text{ScF}_3$  + (3.33 + 0.3·x) g  $\text{Al}_2\text{O}_3$  + (0.7·x) g  $\text{CaF}_2$  + 4.52 g Ca

x: Coefficient on line

Coefficient **x = 10**  
shows best results

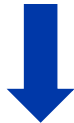

Liquidus temperatur of  
the slag: 1247.5 °C

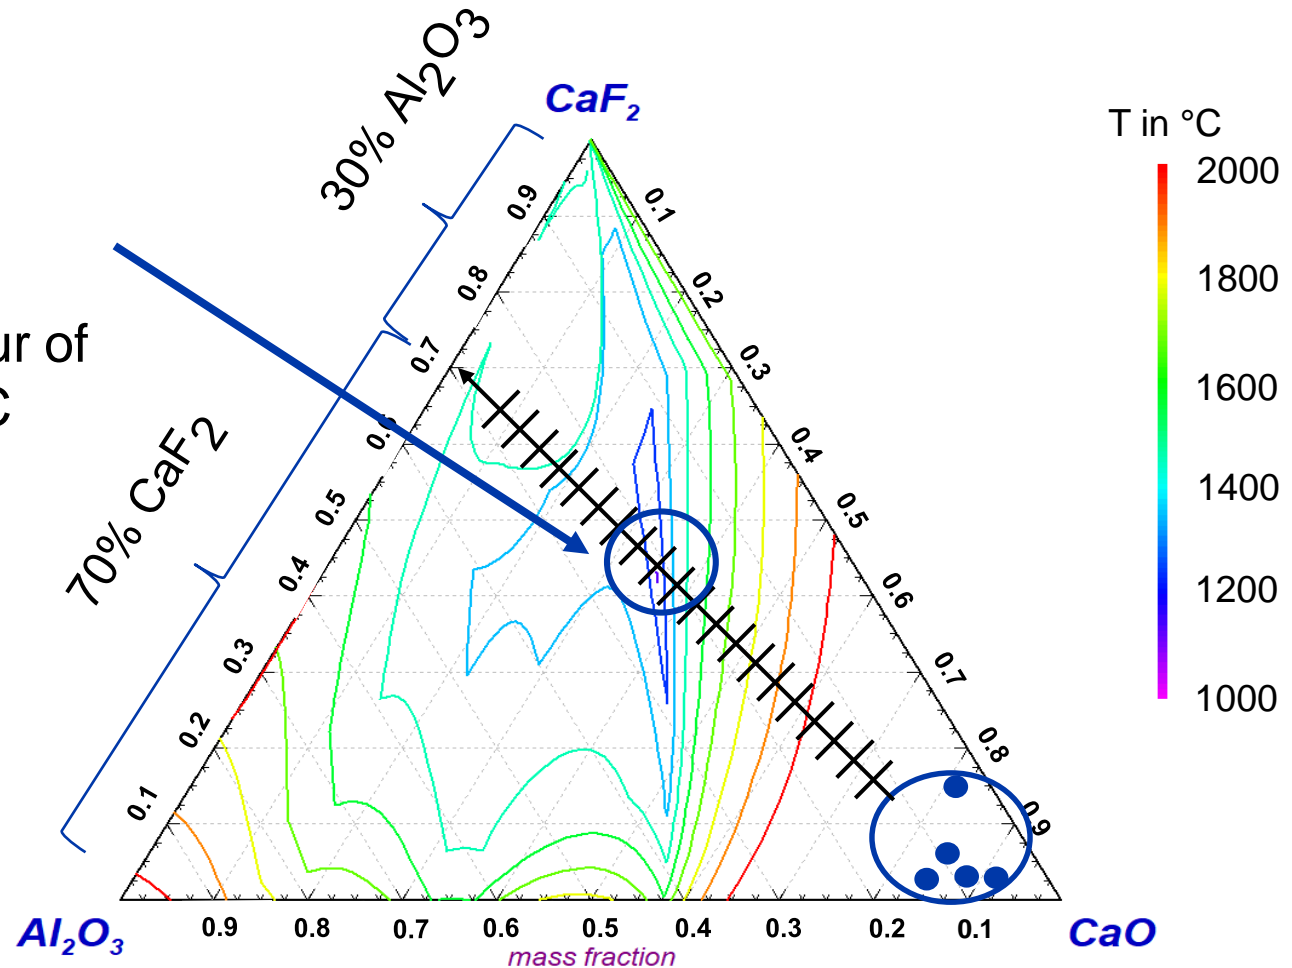



# Calculations in FactSage 7.2

## Calculated systems:

| Coefficient | CaF2 | Al2O3 | ScF3 | Al2O3 | Ca        |
|-------------|------|-------|------|-------|-----------|
| 0           | 0    | 0     | 1    | 3,332 | 4,5188499 |
| 1           | 0,7  | 0,3   | 1    | 3,332 | 4,5188499 |
| 2           | 1,4  | 0,6   | 1    | 3,332 | 4,5188499 |
| 3           | 2,1  | 0,9   | 1    | 3,332 | 4,5188499 |
| 4           | 2,8  | 1,2   | 1    | 3,332 | 4,5188499 |
| 5           | 3,5  | 1,5   | 1    | 3,332 | 4,5188499 |
| 6           | 4,2  | 1,8   | 1    | 3,332 | 4,5188499 |
| 7           | 4,9  | 2,1   | 1    | 3,332 | 4,5188499 |
| 8           | 5,6  | 2,4   | 1    | 3,332 | 4,5188499 |
| 9           | 6,3  | 2,7   | 1    | 3,332 | 4,5188499 |
| 10          | 7    | 3     | 1    | 3,332 | 4,5188499 |
| 11          | 7,7  | 3,3   | 1    | 3,332 | 4,5188499 |
| 12          | 8,4  | 3,6   | 1    | 3,332 | 4,5188499 |
| 13          | 9,1  | 3,9   | 1    | 3,332 | 4,5188499 |
| 14          | 9,8  | 4,2   | 1    | 3,332 | 4,5188499 |
| 15          | 10,5 | 4,5   | 1    | 3,332 | 4,5188499 |
| 16          | 11,2 | 4,8   | 1    | 3,332 | 4,5188499 |
| 17          | 11,9 | 5,1   | 1    | 3,332 | 4,5188499 |
| 18          | 12,6 | 5,4   | 1    | 3,332 | 4,5188499 |
| 19          | 13,3 | 5,7   | 1    | 3,332 | 4,5188499 |
| 20          | 14   | 6     | 1    | 3,332 | 4,5188499 |

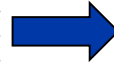

The screenshot shows the 'Equilib - Reactants' window in FactSage 7.2. The 'Reactants' list contains four entries:

| Mass(g)     | Species | Phase | T(C) | P(total)** | Stream# | Data |
|-------------|---------|-------|------|------------|---------|------|
| 1           | ScF3    |       |      |            | 1       |      |
| + 3.632     | Al2O3   |       |      |            | 1       |      |
| + 4.5188499 | Ca      |       |      |            | 1       |      |
| + 0.7       | CaF2    |       |      |            | 1       |      |

Below this, the 'Equilib - Menu: last system' window is visible, showing the 'Reactants (4)' list: (gram) ScF3 + 3.632 Al2O3 + 4.5188499 Ca + 0.7 CaF2. The 'Products' section shows a list of solution phases, with 'FTlite-Liqu' (Liquid) selected. The 'Final Conditions' are set to T(C) = 1400 and P(atm) = 1. The 'Equilibrium' options are set to 'normal'.

## Equilib-Mode

- Databases also FactPS, FToxid, FTsalt and FTlite
- Results at 1400 °C and 1 atm
- Varying the amount of feed material to get 20 wt.-% Al-Sc alloy with different slags

# Calculations in FactSage 7.2

| Coefficient | Slag to metal ratio | slag composition |                                |                  |                  |                                | melting temperature [°C] | metal composition |       |       |       |       |
|-------------|---------------------|------------------|--------------------------------|------------------|------------------|--------------------------------|--------------------------|-------------------|-------|-------|-------|-------|
|             |                     | CaO              | Al <sub>2</sub> O <sub>3</sub> | CaF <sub>2</sub> | AlF <sub>3</sub> | Sc <sub>2</sub> O <sub>3</sub> |                          | Ca                | Al    | Sc    | Al    | Sc    |
| 0           | 2,72                | 81,1%            | 2,4%                           | 13,6%            | 2,9%             |                                | 2304,9                   | 13,3%             | 68,2% | 18,5% | 78,6% | 21,4% |
| 1           | 3,15                | 72,6%            | 4,6%                           | 18,1%            | 4,7%             |                                | 2155,24                  | 12,9%             | 68,5% | 18,6% | 78,7% | 21,3% |
| 2           | 3,58                | 65,9%            | 6,4%                           | 21,6%            | 6,1%             | 0,00279                        | 2017,19                  | 12,8%             | 68,7% | 18,5% | 78,8% | 21,2% |
| 3           | 4,00                | 60,7%            | 7,8%                           | 24,3%            | 7,1%             | 0,00649                        | 1897,11                  | 12,8%             | 68,8% | 18,4% | 78,9% | 21,1% |
| 4           | 4,43                | 56,4%            | 9,0%                           | 26,6%            | 8,0%             | 0,00883                        | 1781,93                  | 12,7%             | 68,9% | 18,4% | 78,9% | 21,1% |
| 5           | 4,85                | 52,9%            | 10,0%                          | 28,4%            | 8,7%             | 0,01043                        | 1679,03                  | 12,7%             | 68,9% | 18,3% | 79,0% | 21,0% |
| 6           | 5,27                | 50,0%            | 10,8%                          | 30,0%            | 9,2%             | 0,01160                        | 1586,74                  | 12,7%             | 69,0% | 18,3% | 79,0% | 21,0% |
| 7           | 5,70                | 47,4%            | 11,5%                          | 31,3%            | 9,7%             | 0,01249                        | 1489,57                  | 12,7%             | 69,0% | 18,3% | 79,0% | 21,0% |
| 8           | 6,14                | 45,4%            | 12,0%                          | 32,4%            | 10,2%            | 0,01236                        | 1389,53                  | 12,3%             | 69,3% | 18,3% | 79,1% | 20,9% |
| 9           | 6,67                | 44,1%            | 12,1%                          | 33,1%            | 10,7%            | 0,01760                        | 1299,14                  | 10,0%             | 71,6% | 18,5% | 79,5% | 20,5% |
| 10          | 7,21                | 43,0%            | 12,1%                          | 33,7%            | 11,2%            | 0,03523                        | 1247,54                  | 8,0%              | 73,8% | 18,2% | 80,2% | 19,8% |
| 11          | 7,74                | 41,9%            | 12,2%                          | 34,1%            | 11,7%            | 0,05748                        | 1279,13                  | 6,6%              | 75,7% | 17,8% | 81,0% | 19,0% |
| 12          | 8,26                | 41,0%            | 12,3%                          | 34,5%            | 12,2%            | 0,07844                        | 1330,49                  | 5,5%              | 77,2% | 17,3% | 81,7% | 18,3% |
| 13          | 8,77                | 40,1%            | 12,4%                          | 34,8%            | 12,7%            | 0,09568                        | 1353,81                  | 4,7%              | 78,4% | 16,9% | 82,2% | 17,8% |
| 14          | 9,26                | 39,3%            | 12,5%                          | 35,0%            | 13,1%            | 0,10916                        | 1361,94                  | 4,1%              | 79,3% | 16,6% | 82,7% | 17,3% |
| 15          | 9,75                | 38,6%            | 12,6%                          | 35,2%            | 13,6%            | 0,11966                        | 1363,04                  | 3,7%              | 80,0% | 16,4% | 83,0% | 17,0% |
| 16          | 10,24               | 38,0%            | 12,7%                          | 35,4%            | 14,0%            | 0,12806                        | 1359,91                  | 3,3%              | 80,5% | 16,2% | 83,3% | 16,7% |
| 17          | 10,72               | 37,4%            | 12,8%                          | 35,5%            | 14,4%            | 0,13504                        | 1354,24                  | 3,1%              | 80,9% | 16,0% | 83,5% | 16,5% |
| 18          | 11,19               | 36,8%            | 12,9%                          | 35,6%            | 14,7%            | 0,14109                        | 1361,16                  | 2,8%              | 81,3% | 15,8% | 83,7% | 16,3% |
| 19          | 11,67               | 36,3%            | 13,0%                          | 35,6%            | 15,1%            | 0,14655                        | 1370,68                  | 2,6%              | 81,7% | 15,7% | 83,9% | 16,1% |
| 20          | 12,15               | 35,9%            | 13,1%                          | 35,7%            | 15,4%            | 0,15164                        | 1376,86                  | 2,4%              | 82,0% | 15,6% | 84,0% | 16,0% |

Coefficient of **x = 10** shows best results

- Melting temperature of slag is 1247.54 °C
- Alloy composition is nearly targeted value with 19.8 wt.-% Sc in Al-Sc alloy (after distillation step for Ca-removal)
- Slag to metal ratio is high but acceptable

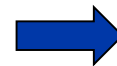

## Feed material

|                                |         |
|--------------------------------|---------|
| ScF <sub>3</sub>               | 1 g     |
| Al <sub>2</sub> O <sub>3</sub> | 6.332 g |
| CaF <sub>2</sub>               | 7 g     |
| Ca                             | 4.52 g  |

# Calculations in FactSage 7.2

## Sc in Ca/Al: Reaction/Equilib module

1.

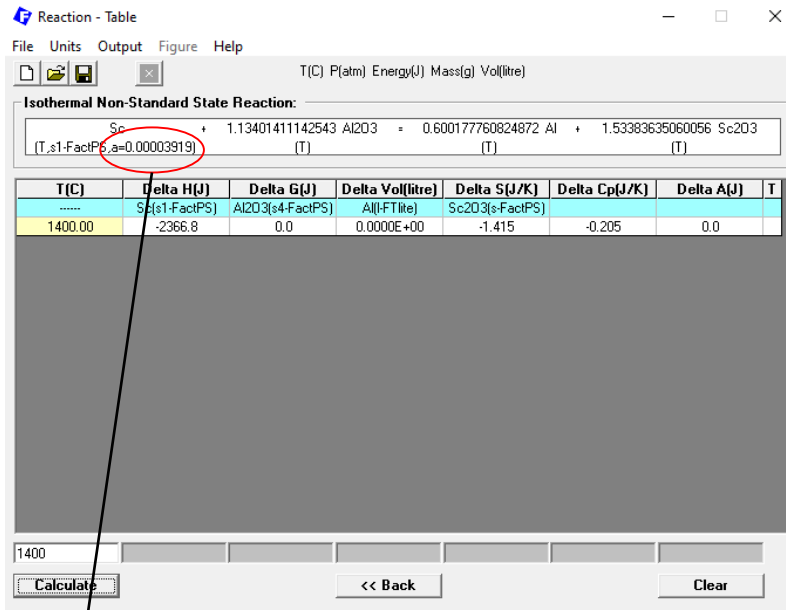

### Reaction module

- Derive equilibrium activity of Sc in contact  $\text{Al}_2\text{O}_3$  (most unstable substance in system)
- Threshold for maximum content attainable in Al-Sc-Ca alloy

2.

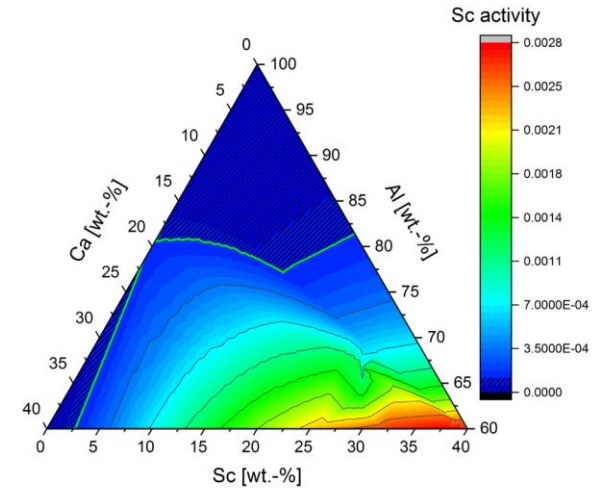

### Equilib module

- Calculate Sc activity in the Al-rich corner of the ternary Al-Sc-Ca system with multiple binary cuts
- Indicate the regions where Sc activity is below the derived threshold
